# Supplementary material for: The Val34Met, Thr164Ile and Ser220Cys Polymorphisms of the β2-Adrenergic Receptor and Their Consequences on the Receptor Conformational Features: A Molecular Dynamics Simulation Study
Source: MDPI journal article supplement (doi:10.3390/ijms23105449), 2022-05-13
Supplement: s1 [file s1]

## Supporting Information

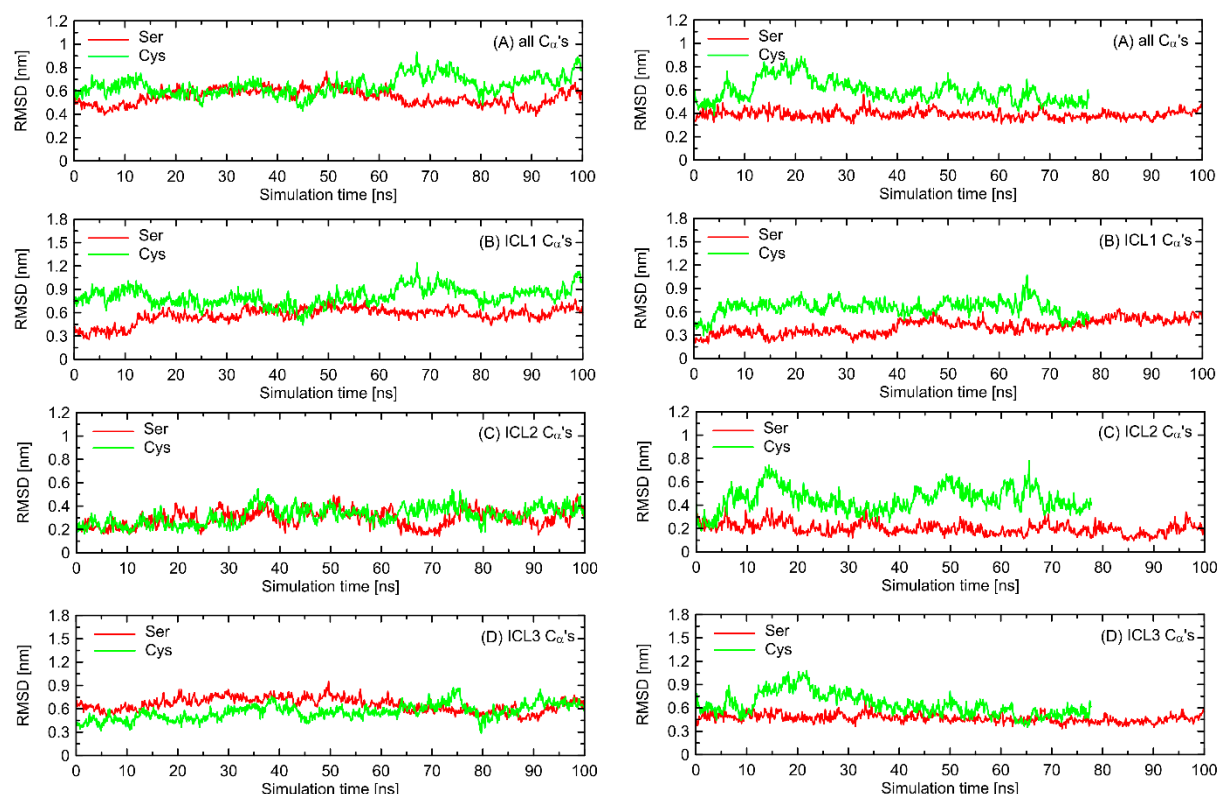

**Figure S1.** The values of the root-mean square deviation (RMSD) parameters calculated for the  $\beta 2$ -AR<sup>Ser220</sup> and  $\beta 2$ -AR<sup>Cys220</sup> polymorphs with respect to the structure of Gs-bound  $\beta 2$ -AR (PDB:3SN6). The data concern the all-atom molecular dynamics (MD) simulations of Gs-free  $\beta 2$ -AR with a clipped 3<sup>rd</sup> intracellular loop (ICL3) model and are the result of the two further, independent MD runs, in comparison to the data illustrated in Fig. 7 (main manuscript). (A) RMSD calculated on the all C $\alpha$  carbon atoms in all three intracellular loops. (B-D) RMSD calculated on the C $\alpha$  carbon atoms belonging to the particular intracellular loops: (B): ICL1 (Lys60-Thr66); (C) ICL2 (Phe133-Asn148); (D) ICL3 (Ser/Cys220-Glu268).

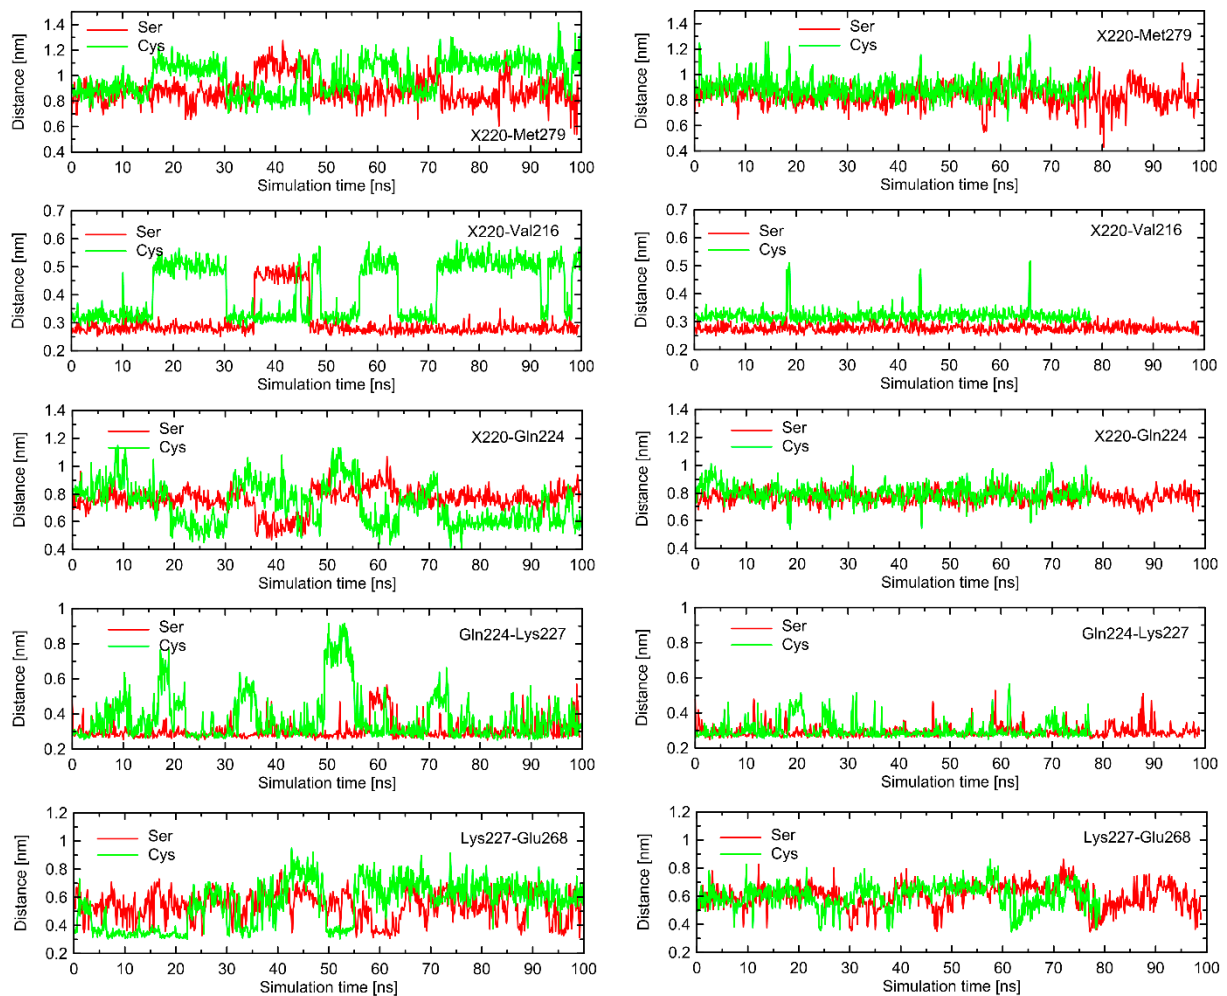

**Figure S2.** The selected, time-dependent interatomic distances (defined as described in the Methods section) identified in the analysis of MD simulations as potentially important for polymorphism-related effects in G-protein binding by  $\beta$ 2-AR. The data concern the all-atom molecular dynamics (MD) simulations of Gs-free  $\beta$ 2-AR with the clipped 3<sup>rd</sup> intracellular loop (ICL3) model and are the result of the two further, independent MD runs, in comparison to the data illustrated in Fig. 8 (main manuscript). The shown distances correspond to structural rearrangements occurring within ICL3. X = Ser or Cys.

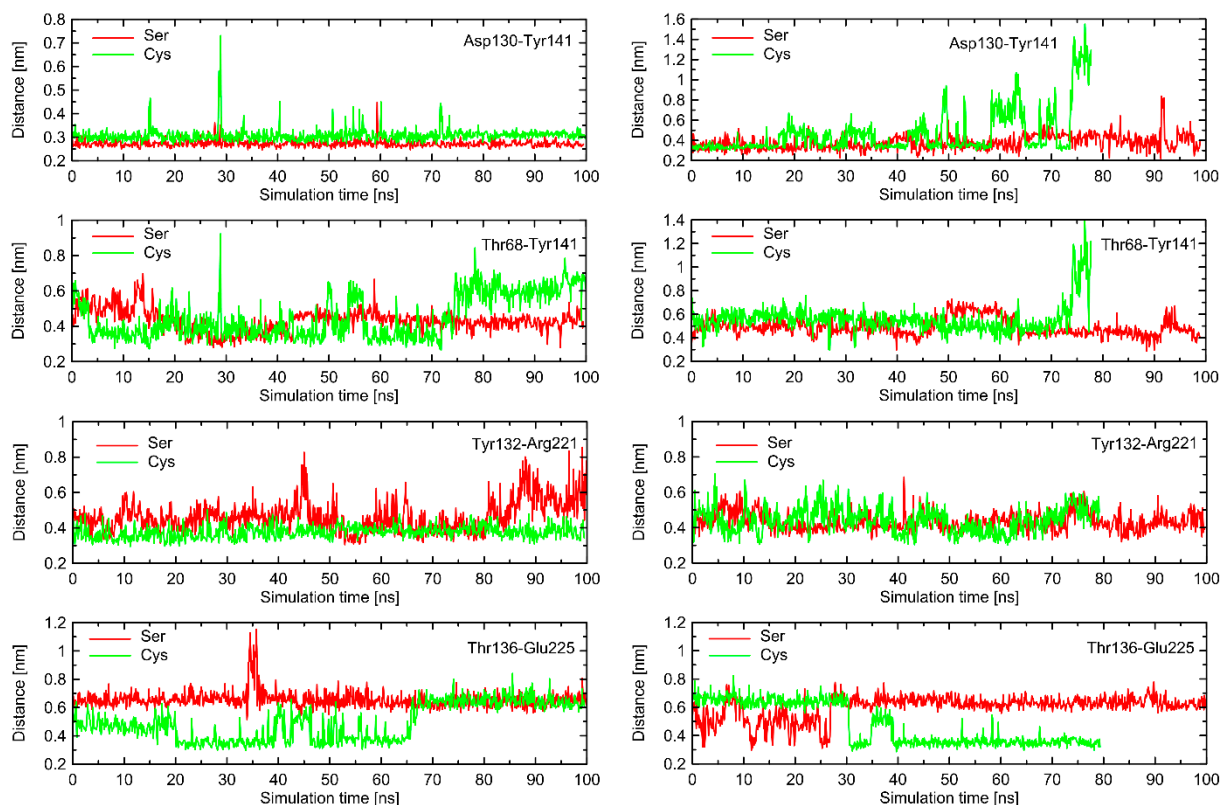

**Figure S3.** The selected, time-dependent interatomic distances (defined as described in the Methods section) identified in the analysis of molecular dynamics (MD) simulations as potentially important for polymorphism-related effects in G-protein binding by  $\beta 2$ -AR. The data concern the all-atom MD simulations of Gs-free  $\beta 2$ -AR with the clipped 3<sup>rd</sup> intracellular loop (ICL3) model and are the result of the two further, independent MD runs, in comparison to the data illustrated in Fig. 9 (main manuscript). The shown distances correspond to structural rearrangements occurring within ICL1 and ICL2. X = Ser or Cys.

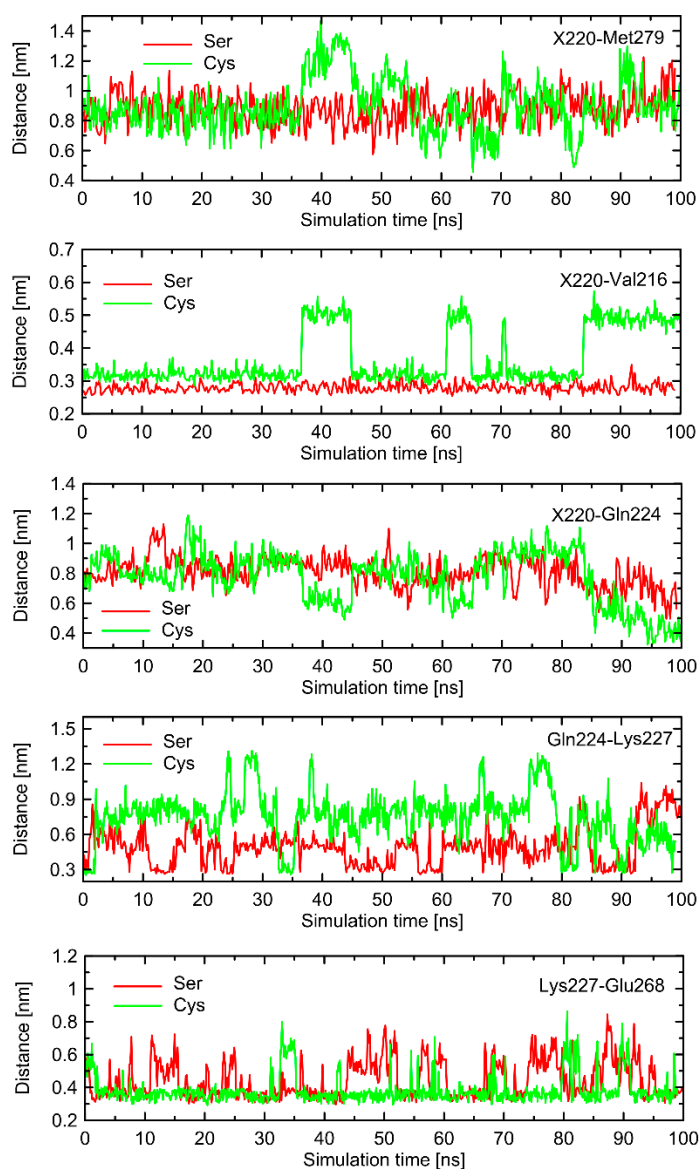

**Figure S4.** The selected, time-dependent interatomic distances (defined as described in the Methods section) identified in the analysis of molecular dynamics (MD) simulations as potentially important for polymorphism-related effects in G-protein binding by  $\beta$ 2-AR. The data concern the all-atom MD simulations of Gs-free  $\beta$ 2-AR with a fully reconstructed the 3<sup>rd</sup> intracellular loop (ICL3) model and are the result of the two further, independent MD runs, in comparison to the data illustrated in Fig. 8 (main manuscript). The shown distances correspond to structural rearrangements occurring within ICL3. X = Ser or Cys.

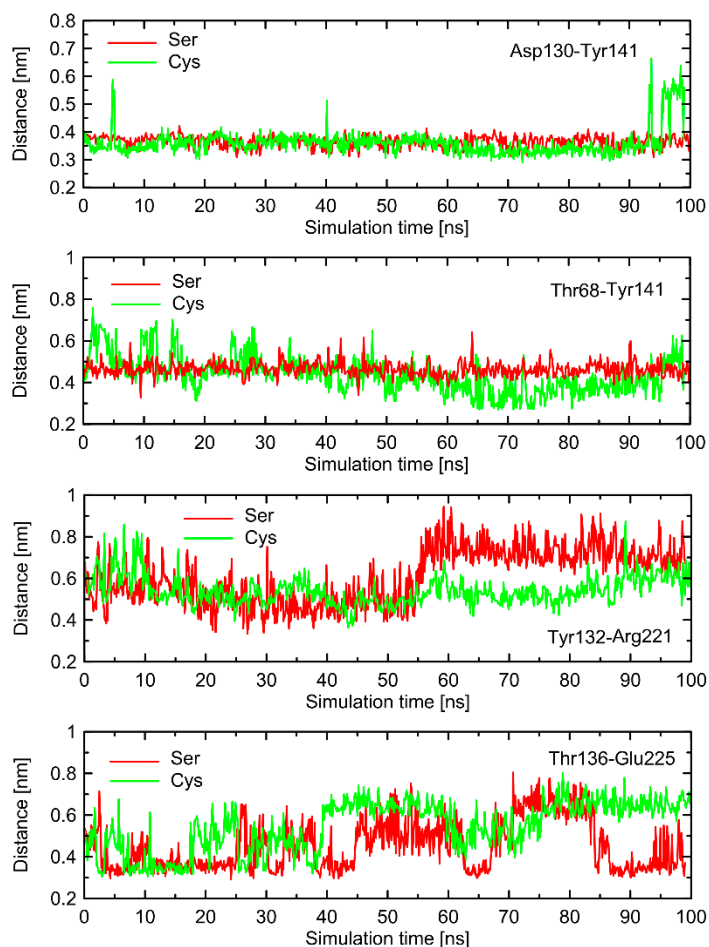

**Figure S5.** The selected, time-dependent interatomic distances (defined as described in the Methods section) identified in the analysis of molecular dynamics (MD) simulations as potentially important for polymorphism-related effects in G-protein binding by  $\beta 2$ -AR. The data concern the all-atom MD simulations of Gs-free  $\beta 2$ -AR with a fully reconstructed the 3<sup>rd</sup> intracellular loop (ICL3) model and are the result of the two further, independent MD runs, in comparison to the data illustrated in Fig. 9 (main manuscript). The shown distances correspond to structural rearrangements occurring within ICL1 and ICL2. X = Ser or Cys.

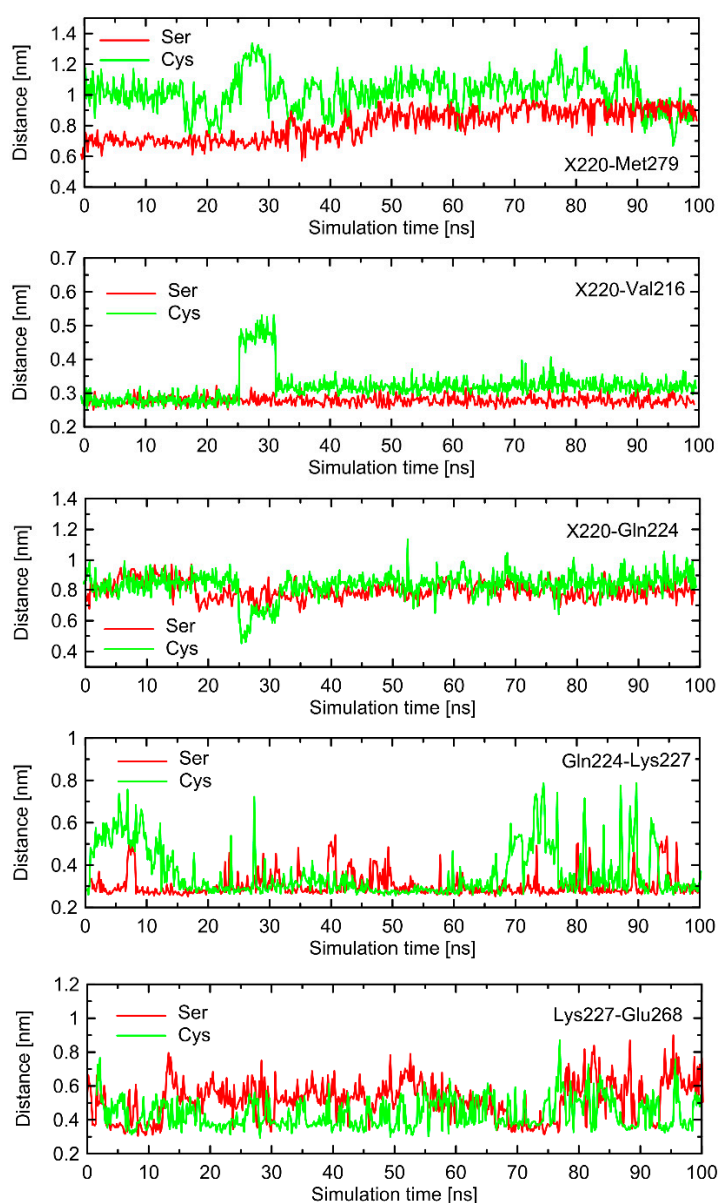

**Figure S6.** The selected, time-dependent interatomic distances (defined as described in the Methods section) identified in the analysis of molecular dynamics (MD) simulations as potentially important for polymorphism-related effects in G-protein binding by  $\beta 2$ -AR. The data concern the all-atom MD simulations of Gs-free  $\beta 2$ -AR with an open loop model of the 3<sup>rd</sup> intracellular loop (ICL3) and are the result of the two further, independent MD runs, in comparison to the data illustrated in Fig. 8 (main manuscript). The shown distances correspond to structural rearrangements occurring within ICL3. X = Ser or Cys.

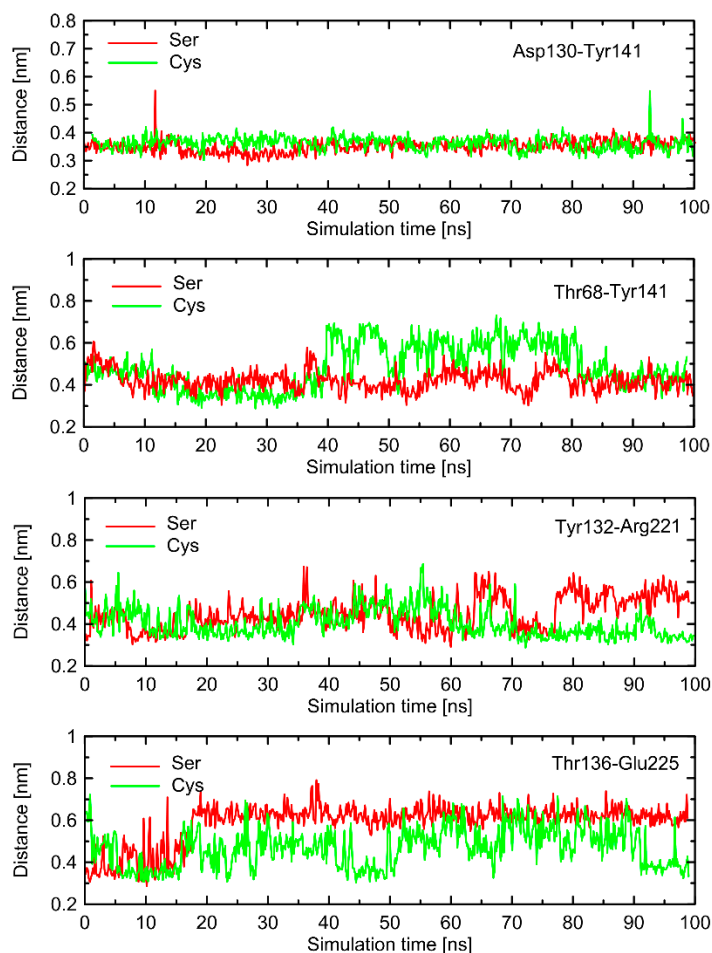

**Figure S7.** The selected, time-dependent interatomic distances (defined as described in the Methods section) identified in the analysis of molecular dynamics (MD) simulations as potentially important for polymorphism-related effects in G-protein binding by  $\beta 2$ -AR. The data concern the all-atom MD simulations of Gs-free  $\beta 2$ -AR with an open loop model of the 3<sup>rd</sup> intracellular loop (ICL3) and are the result of the two further, independent MD runs, in comparison to the data illustrated in Fig. 9 (main manuscript). The shown distances correspond to structural rearrangements occurring within ICL1 and ICL2. X = Ser or Cys.

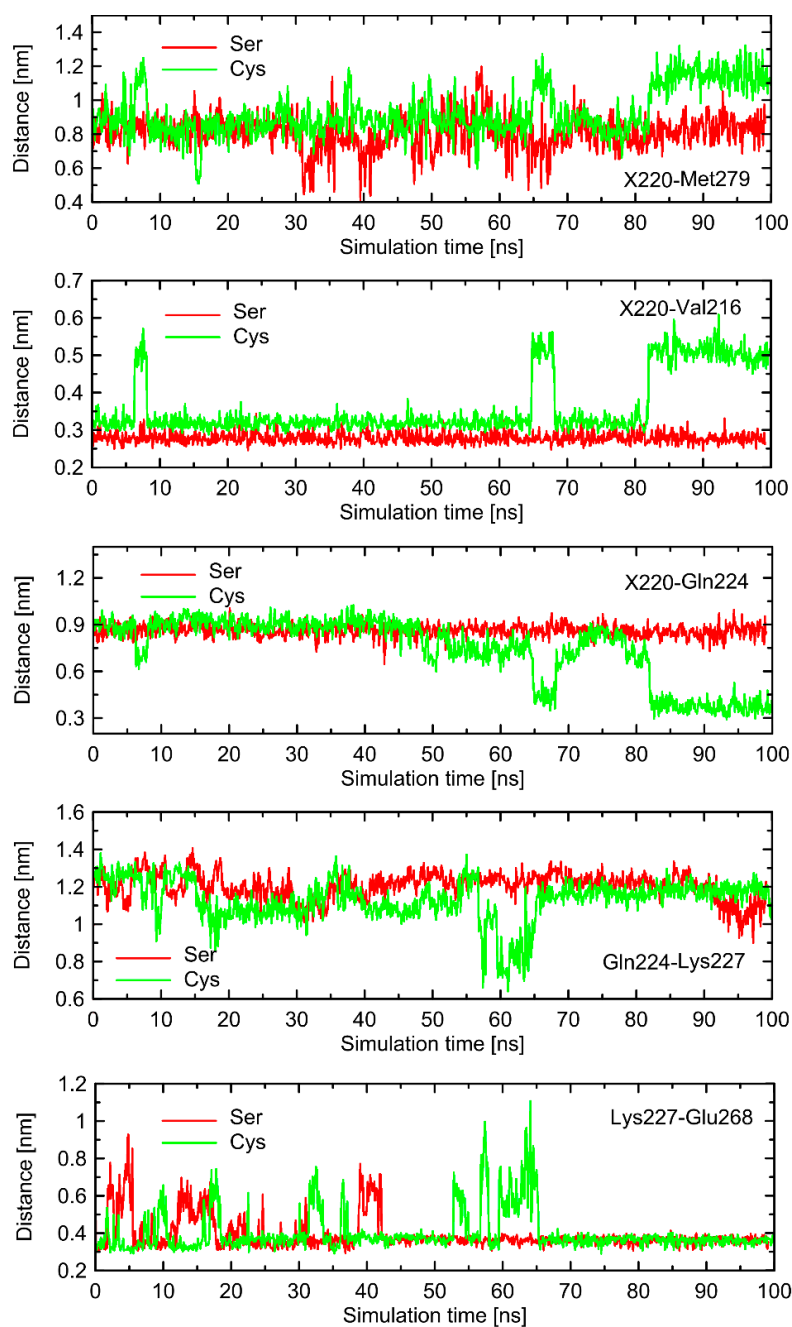

**Figure S8.** The selected, time-dependent interatomic distances identified in the analysis of molecular dynamics (MD) simulations as potentially important for polymorphism-related effects in G-protein binding by  $\beta 2$ -AR. The data were obtained from the unbiased all-atom MD simulations of the  $\beta 2$ -AR in complex with Gs (100 ns run, clipped model of the 3<sup>rd</sup> intracellular loop, ICL3). The shown distances correspond to structural rearrangements occurring within ICL3. X = Ser or Cys.



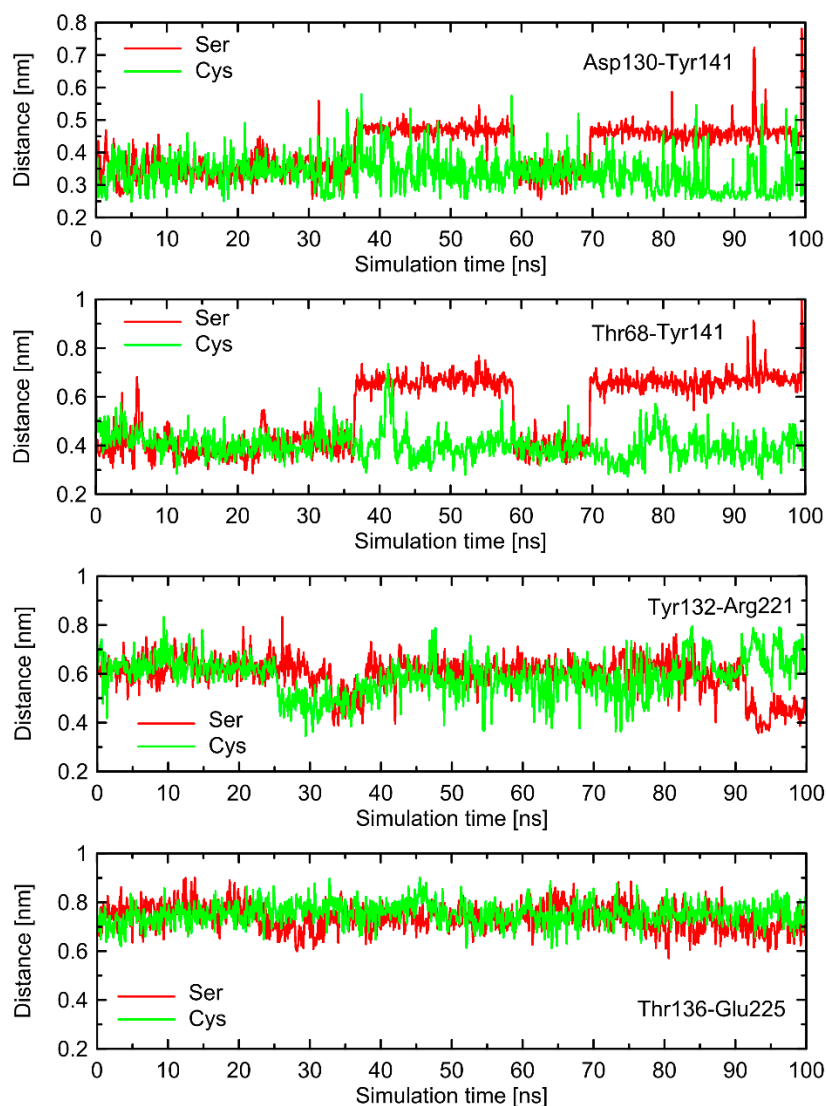

**Figure S9.** The selected, time-dependent interatomic distances identified in the analysis of molecular dynamics (MD) simulations as potentially important for polymorphism-related effects in G-protein binding by  $\beta 2$ -AR. The data were obtained from the unbiased all-atom MD simulations of the  $\beta 2$ -AR in complex with Gs (100 ns run, clipped model of the 3<sup>rd</sup> intracellular loop, ICL3). The shown distances correspond to structural rearrangements occurring within ICL1 and ICL2.
